# Supplementary material for: BOMA, a machine-learning framework for comparative gene expression analysis across brains and organoids
Source: PubMed Central journal article supplement — Cell Rep Methods. 2023 Feb 15;3(2):100409. doi: 10.1016/j.crmeth.2023.100409 (PMC10014309; doi:10.1016/j.crmeth.2023.100409), 2023-02-15
Supplement: mmc1.pdf [file mmc1.pdf]

**Cell Reports Methods, Volume 3**

**Supplemental information**

**BOMA, a machine-learning framework  
for comparative gene expression analysis  
across brains and organoids**

**Chenfeng He, Noah Cohen Kalafut, Soraya O. Sandoval, Ryan Risgaard, Carissa L. Sirois, Chen Yang, Saniya Khullar, Marin Suzuki, Xiang Huang, Qiang Chang, Xinyu Zhao, Andre M.M. Sousa, and Daifeng Wang**

# Supplemental Items

## Supplemental Tables

**Table S1. Summary of transcriptome datasets included in this study. Related to Figures 2,3,4,5 and STAR Methods**

| ID | Paper                   | Time Range*                                     | Number of cells | Source   | Sequencing technology | Use in this work                                                                                                                                                        |
|----|-------------------------|-------------------------------------------------|-----------------|----------|-----------------------|-------------------------------------------------------------------------------------------------------------------------------------------------------------------------|
| 1  | Li et al. 2018          | 8PCW – 40 Y                                     | Bulk            | brain    | mRNA-seq              | <ul style="list-style-type: none"> <li>Identify brain tissue-wise co-expression gene modules (development module)</li> <li>Bulk RNA-seq alignment (Figure 1)</li> </ul> |
| 2  | Polioudaks, et al. 2019 | 17-18PCW                                        | 40,000          | brain    | scRNA-seq             | Identify cell-type specific genes for brain development                                                                                                                 |
| 3  | Nowakowski, et al. 2017 | 6PCW – 32PCW                                    | 4,261           | brain    | scRNA-seq             | Human brain single-cell dataset 1 for large dataset alignment (Figure 5)                                                                                                |
| 4  | Trevino et al. 2021     | 16PCW, 20PCW, 21PCW, 24PCW                      | 57,868          | brain    | scRNA-seq             | Human brain single-cell dataset 2 for large dataset alignment (Figure 5)                                                                                                |
| 5  | Bhaduri et al. 2020     | 14PCW, 18PCW, 22PCW                             | 136,254         | brain    | scRNA-seq             | Human brain single-cell dataset 3 for large dataset alignment (Figure 5)                                                                                                |
| 6  | Gordon et al. 2021      | 50D,75D,100D,150D,200D,250D,300D,350D,400D,600D | Bulk            | organoid | mRNA-seq              | Bulk RNA-seq alignment (Figure 1)                                                                                                                                       |
| 7  | Kanton et al. 2019      | 0D, 4D, 10D, 15D, 1M, 2M,4M                     | 73,358          | organoid | scRNA-seq             | <ul style="list-style-type: none"> <li>Cross-species single-cell alignment (Figure 3)</li> <li>Organoid single-cell alignment in Figure 4;</li> </ul>                   |
| 8  | Birey et al. 2017       | 105D                                            | 11,838          | organoid | scRNA-seq             | Organoid single-cell dataset 1 for large dataset alignment (Figure 5)                                                                                                   |
| 9  | Bhaduri et al. 2020     | 3W, 5W,8W,10W                                   | 189,346         | organoid | scRNA-seq             | Organoid single-cell dataset 2 for large dataset alignment (Figure 5)                                                                                                   |

\*Y: year; M: Month; W: week; D: day; PCW: Postconceptional Week

**Table S2. Number of Gene Modules identified by WGCNA for each brain region. Related to Figure 2 and STAR Methods.**

| <b>Brain region</b> | <b>Name</b>                         | <b>Number of Gene Modules</b> |
|---------------------|-------------------------------------|-------------------------------|
| A1C                 | primary auditory(A1) cortex         | 33                            |
| AMY                 | amygdala                            | 92                            |
| CBC                 | cerebella cortex                    | 114                           |
| DFC                 | dorsolateral prefrontal cortex      | 96                            |
| HIP                 | Hippocampus                         | 53                            |
| IPC                 | posterior inferior parietal cortex  | 68                            |
| ITC                 | inferior temporal cortex            | 37                            |
| M1C                 | primary motor(M1) cortex            | 17                            |
| MD                  | mediodorsal nucleus of the thalamus | 54                            |
| MFC                 | medial prefrontal cortex            | 126                           |
| OFC                 | orbital prefrontal cortex           | 38                            |
| S1C                 | primary somatosensory(S1) cortex    | 99                            |
| STC                 | superior temporal cortex            | 95                            |
| STR                 | Stratum                             | 44                            |
| V1C                 | primary visual(V1) cortex           | 109                           |
| VFC                 | ventrolateral prefrontal cortex     | 116                           |

**Table S3. Interpretation of cell-types annotated in Figure 4B. Related to Figure 4.**

| <b>Cluster Name</b> | <b>Cluster Interpretation (Nowakowski, et al., 2017)</b> |
|---------------------|----------------------------------------------------------|
| Astrocyte           | Astocyte                                                 |
| Choroid             | Choroid                                                  |
| Endothelial         | Endothelial                                              |
| EN-PFC              | Early and Late Born Excitatory Neuron PFC                |
| EN-V1               | Early and Late Born Excitatory Neuron V1                 |
| Glyc                | Glycolysis                                               |
| IN-CTX-CGE          | CGE/LGE-derived inhibitory neurons                       |
| IN-CTX-MGE          | MGE-derived Ctx inhibitory neuron                        |
| IN-STR              | Striatal neurons                                         |
| IPC-div             | Dividing Intermediate Progenitor Cells RG-like           |
| IPC-Nen             | Intermediate Progenitor Cells EN-like                    |
| MGE-div             | dividing MGE Progenitors                                 |
| MGE-IPC             | MGE Progenitors                                          |
| MGE-RG              | MGE Radial Glia 1                                        |
| Microglia           | Micrgolia                                                |
| Mural               | Mural/Pericyte                                           |
| nEN                 | Newborn Excitatory Neuron                                |
| nIN                 | MGE newborn neurons                                      |
| OPC                 | Oligodendrocyte progenitor cell                          |
| RG                  | Radial Glia                                              |
| U                   | Unknown early cells                                      |



**Table S4. Correspondence for sub-cell-types to be grouped into common major cell-types. Related to Figure 5.**

| Sub cell-type                                                                   | Major cell-type |
|---------------------------------------------------------------------------------|-----------------|
| <b>Bhaduri et al. 2020 (organoid), Dataset 5</b>                                |                 |
| Astrocyte                                                                       | Astro           |
| ExcitatoryNeuron                                                                | EN              |
| InhibitoryNeuron                                                                | IN              |
| IPC                                                                             | IPC             |
| Outlier,Unknown                                                                 | Unknown         |
| RadialGlia                                                                      | RG              |
| <b>Nowakowski et al. 2017, Dataset 3</b>                                        |                 |
| Astrocyte                                                                       | Astro           |
| Choroid                                                                         | Choriod         |
| EN-PFC1,EN-PFC2,EN-PFC3,EN-V1-1,EN-V1-2,EN-V1-3,nEN-early1,nEN-early2,nEN-late  | EN              |
| IN-CTX-CGE1,IN-CTX-CGE2,IN-CTX-MGE1,IN-CTX-MGE2,IN-STR,nIN1,nIN2,nIN3,nIN4,nIN5 | IN              |
| IPC-div1,IPC-div2,IPC-nEN1,IPC-nEN2,IPC-nEN3,MGE-IPC1,MGE-IPC2,MGE-IPC3         | IPC             |
| MGE-RG1,MGE-RG2,oRG,RG-div1,RG-div2,RG-early,tRG,vRG                            | RG              |
| Microglia                                                                       | Microglia       |
| Endothelial                                                                     | Endothelial     |
| Mural                                                                           | Mural           |
| OPC                                                                             | OPC             |
| <b>Trevino et al. 2021, Dataset 4</b>                                           |                 |
| CGEIN,MGEIN                                                                     | IN              |
| earlyRG,lateRG,tRG                                                              | RG              |
| EC                                                                              | Endothelial     |
| GluN1,GluN2,GluN3,GluN4,GluN5,GluN6,GluN7,GluN8                                 | EN              |
| MG                                                                              | Microglia       |
| OPC_Oligo                                                                       | OPC             |
| Peric                                                                           | Mural           |
| <b>Bhaduri et al. 2020 (brain), Dataset 9</b>                                   |                 |
| Endothelial                                                                     | Endothelial     |
| ExcitatoryNeuron                                                                | EN              |
| InhibitoryNeuron                                                                | IN              |
| IPC                                                                             | IPC             |
| RadialGlia                                                                      | RG              |
| Outlier,Red blood cells                                                         | Unknown         |
| Mural                                                                           | Mural           |
| Microglia                                                                       | Microglia       |

# Supplemental Figures

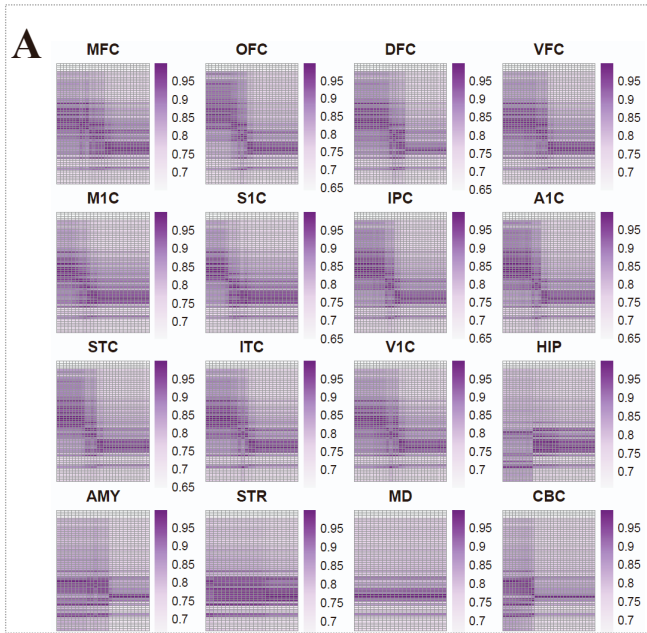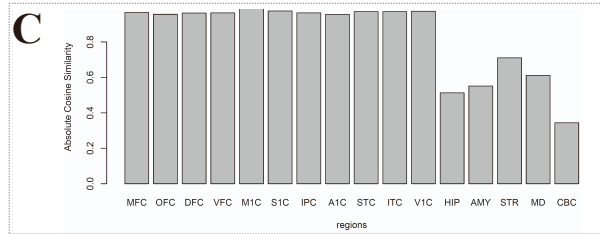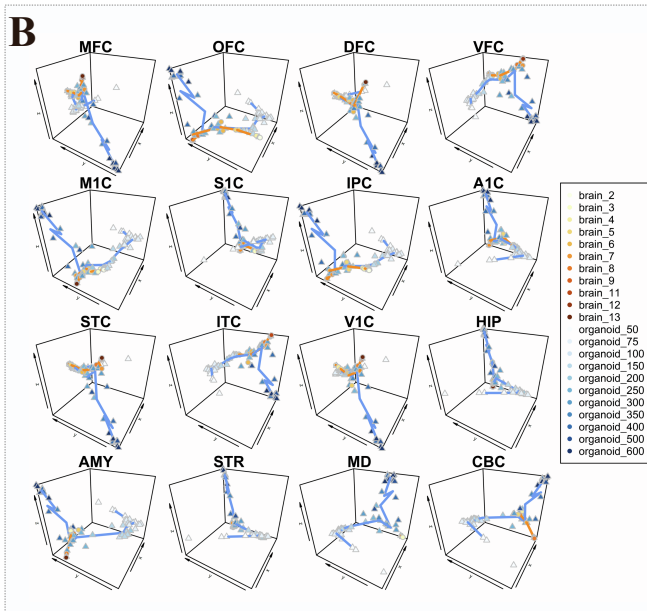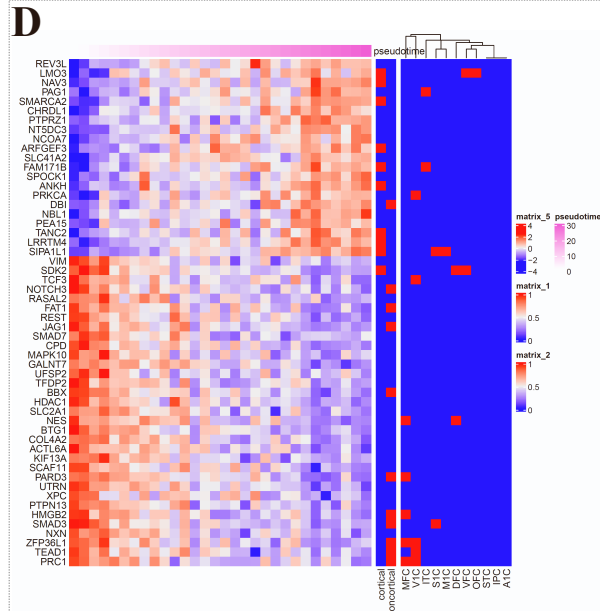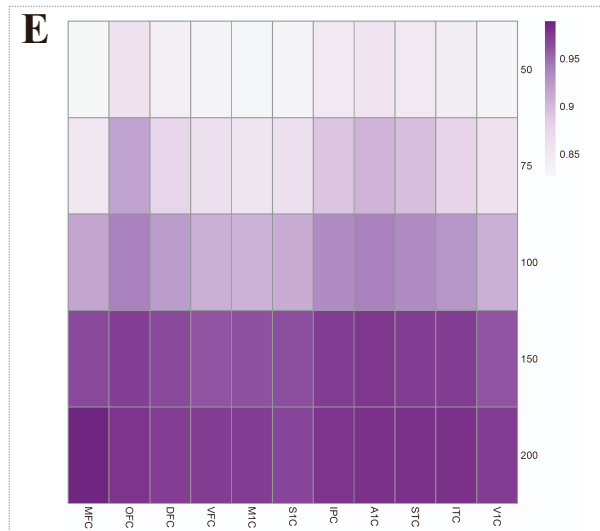

**Figure S1. Alignment and scores between cortical organoids with all 16 brain regions across time. Related to Figure 2.** A). Local alignment scores between organoids with 16 brain regions; B). 3D scatterplot of the alignment. Brain samples were colored red while organoids were colored blue. The color gradients represent the developing time, with the later time-point being darker colors. Blue/red curves link the averaged coordinates of each timepoint to represent the developing trajectory; C). Cosine similarity between trajectories of brains (stage 3-13) and organoids (day 75-300). D). Pseudotime-correlated genes potentially drive the alignment between brain regions and organoid in Figure 2. Organoids genes expression were correlated with the pseudotime (z-axis in Fig2A), genes with absolute Pearson correlation  $> 0.7$  were shown in the heatmap. Brain cortical markers (N=51) and non-cortical markers (N=75) were identified by selecting genes significantly upregulated ( $\log_2\text{FoldChange} > 0.7$  and  $p\text{-value} < 0.05$ ) between stages 3-6. Similarly, individual cortical area markers (N=136) were identified by comparing each area with all the other cortical areas; E). Averaged local alignment scores between organoids versus the 11 cortical regions. S1C: primary somatosensory(S1) cortex; M1C: primary motor(M1) cortex; OFC: orbital prefrontal cortex; DFC: dorsolateral prefrontal cortex; MFC: medial prefrontal cortex; VFC: ventrolateral prefrontal cortex; STR: stratum; HIP: hippocampus; AMY: amygdala; IPC: posterior inferior parietal cortex; A1C: primary auditory(A1) cortex; V1C: primary visual(V1) cortex; STC: superior temporal cortex; ITC: inferior temporal cortex; MD: mediodorsal nucleus of the thalamus; CBC: cerebella cortex.

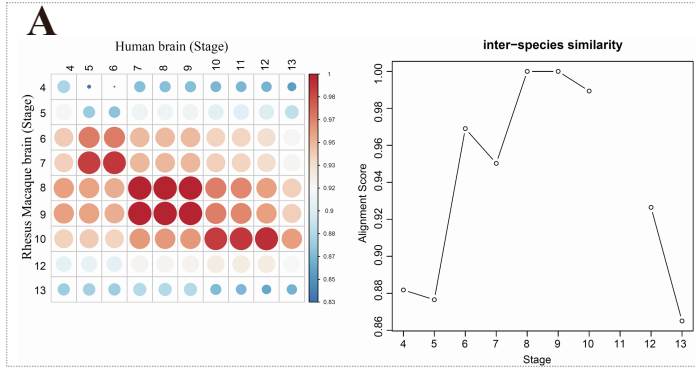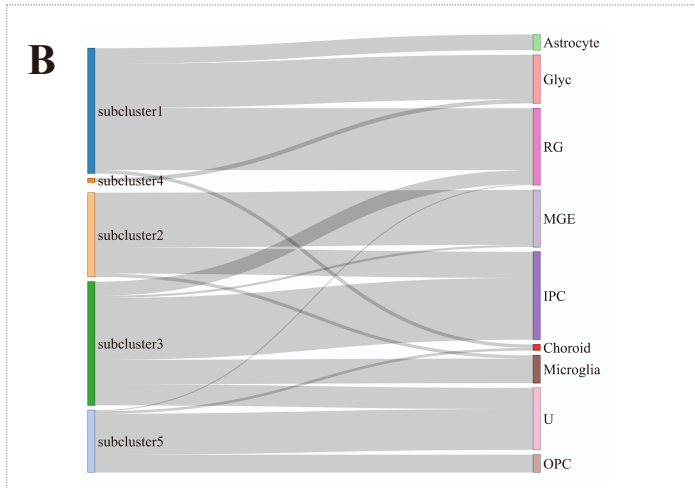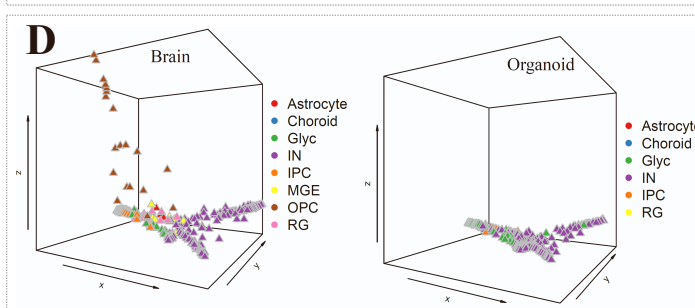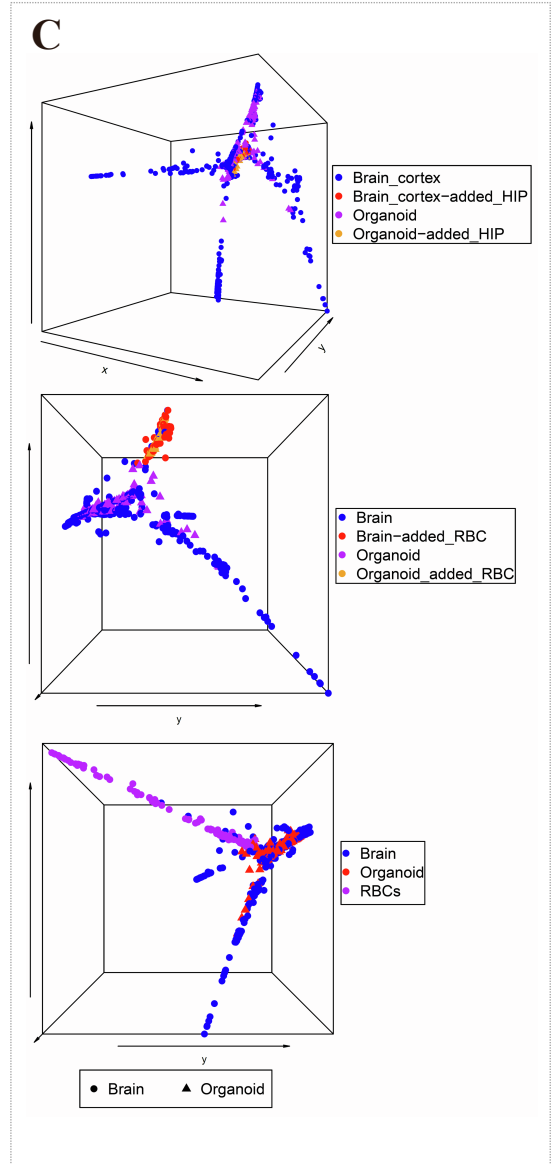

**Figure S2. Evaluate and benchmark the robustness of BOMA. Related to Figure 3 and 4.** A). Human VERSUS Macaque brain. The predicted developmental stages (Zhu Y. et.al., 2018) for Macaque brains was used for the comparative analysis; B). Subclusters of Cluster 1 in Figure 4. Each subcluster is specifically enriched with distinct cell-types. For example, subcluster2 is enriched with MGE and IPC; C). BOMA alignment with intentionally inserted mismatched region or cell-type in Figure 4. Top: BOMA alignment with intentionally added 6,676 Hippocampus (HIP) cells. HIP cells were equally split and inserted into brain cortical and organoid data. After rerunning the data processing and BOMA alignment, organoid cells were aligned with cortical cells but not hippocampal cells. Middle: BOMA alignment with intentionally added 2,170 red blood cells (RBCs). RBCs were equally split and inserted into brain cortical and organoid data in Figure 4. After rerunning the data processing and BOMA alignment, brain and organoid were aligned, while RBCs form a separate branch. Bottom: Alignment with RBCs only inserted to brain data. RBCs also form a separate developing branch in the manifold space. The Hippocampal cells and RBCs were obtained from (Bhaduri et al., 2020)<sup>18</sup>; D). BOMA alignment after intentionally leaving Excitatory Neurons (ExN) out from both Brain and Organoids in Figure 4. The same cell-types from brain and organoid can be well aligned.



**Figure S3. Benchmark BOMA using brain and organoid datasets integrated from multiple studies. Related to Figure 5.** A,B). Minimum batch effects across merged organoid samples (A) and brain samples (B) were observed by tSNE and BOMA. Top left: tSNE analysis of pseudo-cells colored by the corresponding sample sources dataset. Top right: tSNE analysis of pseudo-cells colored by the corresponding cell-types. Bottom left: 3D scatterplot of pseudo-cells colored by sample sources after BOMA; Bottom right: 3D scatterplot of pseudo-cells colored by cell-types after BOMA; C). Human brain and organoid single-cells integrated by Seurat(C) and Liger(D). Left: UMAP colored by datasets. Right: UMAP colored by cell-types; E,F,G). Human brain and organoid pseudo-cells aligned by MMD-MA (E), SCOT (F) and Unioncom (G). Left: 3D scatter plots show the alignment results for 766 organoid pseudo-cells. Right: 3D scatter plots show the alignment results for 1,016 human brain pseudo-cells. The dots are colored by the cell-types. RG cells are marked in red, EN cells are marked in blue, IPC cells are marked in yellow, IN cells are marked in green and OPC cells are marked in pink; H). Cell-types similarity across scRNA-seq datasets quantified by MetaNeighbor. Heatmap generated by applying MetaNeighbor on 10% randomly sampled single-cells from integrated scRNA-seq dataset in Figure 5. The datasets are h1(human1, Nowakowski 2017), h2(human2, Trevino et al. 2021), h3(human3, Bhaduri et al. 2020), o1(organoid1, Birey et al. 2017) and o2(organoid2, Bhaduri et al. 2020).

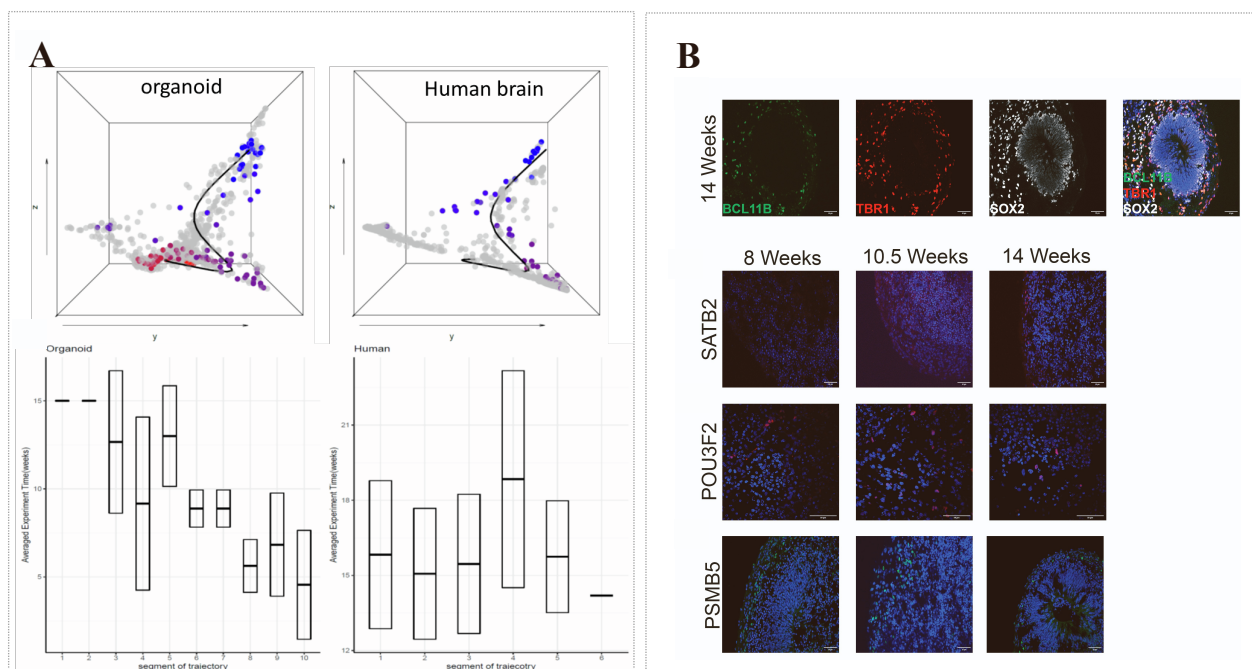

**Figure S4. Trajectory analysis for Intermediate Progenitor Cells (IPCs) and experimental validation. Related to Figure 5 and 6.** A). Trajectory analysis for IPCs. 3D scatter plot shows the inferred trajectory of IPC from the alignment. Organoid (top left) and brain (top right) cells are colored by pseudo-time along the trajectory. Blue means earlier while red means later. The trajectory was divided into 10 segments and correlated with experiment timepoints. The box plot (Bottom) shows the distribution of experimental time-points; B). Representative images of human cortical organoids immunostaining. Top: Image shows expressing progenitor cells positive for SOX2, deep layer cortical neurons positive for BCL11B and TBR1. Bottom: Immunostaining of different stages of differentiation in cortical organoids positive for SATB2, POU3F2 and PSMB5 cells. Quantification is shown in Figures 6C, 6F, and 6I. Scale bars, 50 $\mu$ m.



**A**

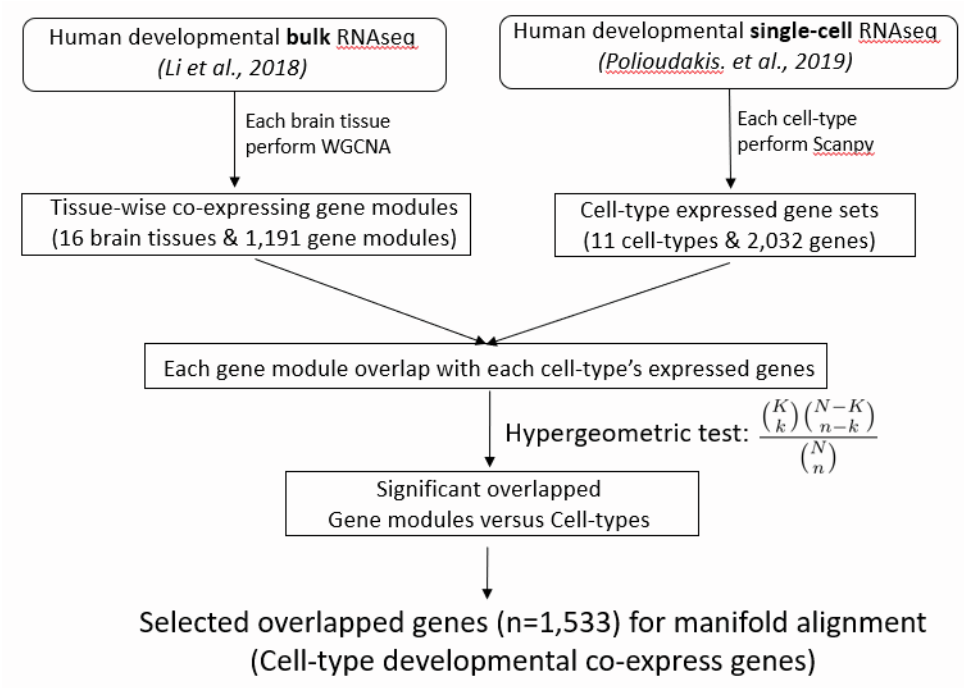

**B**

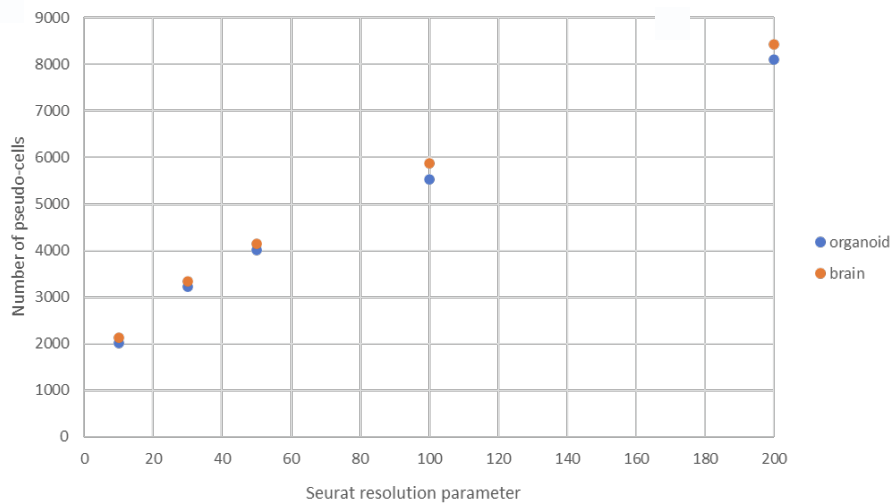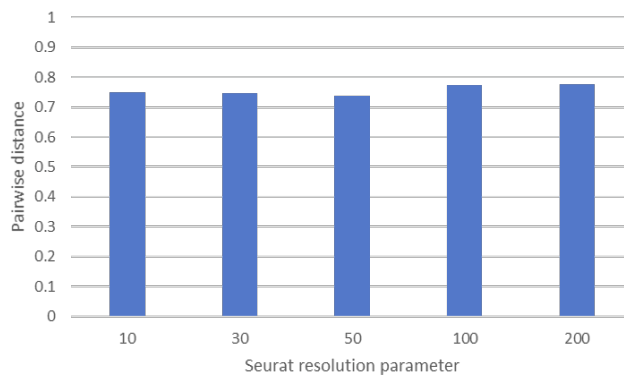

**Figure S5. Selecting human brain developmental genes and the scalability of BOMA to the pseudo-cell numbers. Related to STAR Methods.** A). Flowchart of selecting human brain developmental genes. BH adjusted P-value <0.01 was used as statistical significance threshold. B). BOMA is scalable to the number of pseudo-cells. Top: Number of pseudo-cells generated at different Seurat resolution; Bottom: Averaged pairwise distances between pseudo-cells of the same cell-type.
